# Supplementary material
Source: publisher site journal article supplement (https://www.dovepress.com/article/465828)
Supplement: Supplementary file 1 [file get_supplementary_file.php]

# Supplement

## Supplemental Table 1: Baseline Characteristics stratified by Individual Procedure

| **Variable** | **Overall**,  N = 71 | **ICE2**,  N = 2 | **PEcK**,  N = 32 | **Phaco/ ECP**,  N = 15 | **Phaco/ Hydrus**,  N = 9 | **Phaco/ KDB**,  N = 13 |
| --- | --- | --- | --- | --- | --- | --- |
| **Demographic Characteristics** |  |  |  |  |  |  |
| Age at surgery, mean (SD) [years] | 72.46 (9.24) | 62.44 (14.39) | 72.09 (8.06) | 71.34 (9.96) | 72.55 (8.95) | 76.15 (10.52) |
| Female sex, N (%) | 34 (48%) | 1 (50%) | 14 (44%) | 7 (47%) | 2 (22%) | 10 (77%) |
| Race-Ethnicity, N (%) |  |  |  |  |  |  |
| White | 37 (52%) | 0 (0%) | 16 (50%) | 6 (40%) | 8 (89%) | 7 (54%) |
| Black or African American | 16 (23%) | 0 (0%) | 8 (25%) | 4 (27%) | 1 (11%) | 3 (23%) |
| Hispanic or Latino | 6 (8.5%) | 1 (50%) | 2 (6.2%) | 1 (6.7%) | 0 (0%) | 2 (15%) |
| Asian | 2 (2.8%) | 0 (0%) | 1 (3.1%) | 1 (6.7%) | 0 (0%) | 0 (0%) |
| Other | 4 (5.6%) | 1 (50%) | 3 (9.4%) | 0 (0%) | 0 (0%) | 0 (0%) |
| Declined | 6 (8.5%) | 0 (0%) | 2 (6.2%) | 3 (20%) | 0 (0%) | 1 (7.7%) |
| Non-English speaker, N (%) | 15 (21%) | 1 (50%) | 6 (19%) | 4 (27%) | 1 (11%) | 3 (23%) |
| **Glaucoma Characteristics** |  |  |  |  |  |  |
| IOP, mean (SD) [mmHg] | 16.66 (5.81) | 14.00 (2.83) | 16.52 (5.37) | 17.97 (7.52) | 17.36 (6.04) | 15.43 (5.07) |
| Number of glaucoma medications, mean (SD) | 2.28 (1.85) | 2.00 (1.41) | 3.00 (1.63) | 3.33 (1.23) | 0.44 (1.33) | 0.62 (1.33) |
| Glaucoma Type, N (%) |  |  |  |  |  |  |
| Primary Open Angle | 47 (66%) | 0 (0%) | 22 (69%) | 8 (53%) | 7 (78%) | 10 (77%) |
| Mixed mechanism | 12 (17%) | 2 (100%) | 4 (12%) | 6 (40%) | 0 (0%) | 0 (0%) |
| Pseudoexfoliation | 6 (8.5%) | 0 (0%) | 3 (9.4%) | 0 (0%) | 1 (11%) | 2 (15%) |
| Pigmentary | 1 (1.4%) | 0 (0%) | 1 (3.1%) | 0 (0%) | 0 (0%) | 0 (0%) |
| Normal or Low Tension | 5 (7.0%) | 0 (0%) | 2 (6.2%) | 1 (6.7%) | 1 (11%) | 1 (7.7%) |
| Prior laser trabeculoplastya on operative eye, N (%) | 17 (24%) | 0 (0%) | 8 (25%) | 1 (6.7%) | 3 (33%) | 5 (38%) |
| Prior LPI on operative eye, N (%) | 9 (13%) | 0 (0%) | 4 (12%) | 4 (27%) | 1 (11%) | 0 (0%) |
| **Other Ocular Characteristics** |  |  |  |  |  |  |
| CDVA LogMAR, mean (SD) [log unit] | 0.41 (0.47) | 0.10 (0.00) | 0.43 (0.61) | 0.41 (0.28) | 0.30 (0.26) | 0.48 (0.38) |
| Prior surgery on operative eye, N (%) |  |  |  |  |  |  |
| Non-Functioning Glaucoma Drainage Implant | 3 (4.2%) | 0 (0%) | 1 (3.1%) | 2 (13%) | 0 (0%) | 0 (0%) |
| Scarred-Down Trabeculectomy | 3 (4.2%) | 1 (50%) | 1 (3.1%) | 1 (6.7%) | 0 (0%) | 0 (0%) |
| Iridectomy | 1 (1.4%) | 0 (0%) | 1 (3.1%) | 0 (0%) | 0 (0%) | 0 (0%) |
| Corneal | 1 (1.4%) | 0 (0%) | 0 (0%) | 0 (0%) | 0 (0%) | 1 (7.7%) |
| Retinal | 3 (4.2%) | 0 (0%) | 1 (3.1%) | 0 (0%) | 0 (0%) | 2 (15%) |
| None | 60 (85%) | 1 (50%) | 28 (88%) | 12 (80%) | 9 (100%) | 10 (77%) |
| **Procedure Characteristics** |  |  |  |  |  |  |
| Procedure duration, mean (SD) [minutes] | 40.61 (11.42) | 37.50 (20.51) | 40.16 (11.87) | 43.47 (7.15) | 37.11 (10.01) | 41.31 (14.59) |
| Clock hours incised by KDB, mean (SD) | 3.72 (0.66) | — | 3.92 (0.51) | — | — | 3.21 (0.76) |
| Degrees of ECP, mean (SD) [degrees] | 210.33 (40.61) | 235.00 (21.21) | 200.83 (31.30) | 227.14 (53.70) | — | — |
| Power of ECP, mean (SD) [W] | 0.33 (0.07) | 0.40 (0.00) | 0.34 (0.06) | 0.29 (0.09) | — | — |

**Supplemental** **Table 1:** Baseline demographics, disease characteristics, and procedural history in subjects who underwent phacoemulsification with single or combined MIGS (sMIGS or cMIGS respectively) as stratified by individual procedures. Kruskal-Wallis rank sum tests and Pearson's Chi-squared tests with significance defined as p < 0.05. aLaser trabeculoplasty includes Laser Trabeculoplasty (LTP), Argon Laser Trabeculoplasty (ALT), or Selective Laser Trabeculoplasty (SLT). ICE2 = iStent infinite insertion, cataract extraction, and endocyclophotocoagulation. IOP = Intraocular pressure. CDVA = best corrected distance visual acuity. LPI = Laser Peripheral Iridotomy. Phaco/ECP = phacoemulsification and endocyclophotocoagulation. Phaco/Hydrus = phacoemulsification and Hydrus microstent. Phaco/KDB = phacoemulsification and Kahook Dual Blade. PEcK = phacoemulsification, endocyclophotocoagulation, and Kahook Dual Blade.

## Supplemental Table 2: Change in Intraocular Pressure stratified by Individual Procedure

| **Outcome: IOP [mmHg]** | **Overall** | | **ICE2** | | **PEcK** | | **Phaco/ ECP** | | **Phaco/ Hydrus** | | **Phaco/ KDB** | | |
| --- | --- | --- | --- | --- | --- | --- | --- | --- | --- | --- | --- | --- | --- |
| N | Mean (SD) | N | Mean (SD) | N | Mean (SD) | N | Mean (SD) | N | Mean (SD) | N | Mean (SD) |
| Baseline | 71 | 16.7 (5.8) | 2 | 14.0 (2.8) | 32 | 16.5 (5.4) | 15 | 18.0 (7.5) | 9 | 17.4 (6.0) | 13 | 15.4 (5.1) |
| 6 weeks | 67 | 13 (3.8) | 2 | 10.0 (1.4) | 30 | 12.9 (3.8) | 15 | 13.6 (4.1) | 7 | 14.4 (4.4) | 13 | 12.1 (3.3) |
| 3 months | 46 | 12.4 (3.9) | 2 | 10.5 (2.1) | 20 | 11.9 (3.9) | 11 | 13.4 (4.9) | 6 | 13.2 (3.7) | 7 | 12.4 (3.1) |
| 6 months | 51 | 13.5 (3.1) | 1 | 7.0 (0.0) | 20 | 12.8 (3.1) | 13 | 14.6 (3.7) | 6 | 14.7 (2.2) | 11 | 13.4 (2.1) |
| 12 months | 37 | 13.5 (3.6) | 2 | 14.0 (1.4) | 16 | 12.7 (3.0) | 9 | 12.9 (2.0) | 5 | 15.0 (1.6) | 5 | 15.2 (7.8) |

**Supplemental** **Table 2:** Mean intraocular pressure (IOP) at postoperative timepoints as stratified by individual procedures. ICE2 = iStent infinite insertion, cataract extraction, and endocyclophotocoagulation. Phaco/ECP = phacoemulsification and endocyclophotocoagulation. Phaco/Hydrus = phacoemulsification and Hydrus microstent. Phaco/KDB = phacoemulsification and Kahook Dual Blade. PEcK = phacoemulsification, endocyclophotocoagulation, and Kahook Dual Blade.

## Supplemental Table 3: Change in Medication Burden stratified by Individual Procedure

| **Outcome: Medication Burden** | **Overall** | | **ICE2** | | **PEcK** | | **Phaco/ ECP** | | **Phaco/ Hydrus** | | **Phaco/ KDB** | | |
| --- | --- | --- | --- | --- | --- | --- | --- | --- | --- | --- | --- | --- | --- |
| N | Mean (SD) | N | Mean (SD) | N | Mean (SD) | N | Mean (SD) | N | Mean (SD) | N | Mean (SD) |
| Baseline | 71 | 2.3 (1.9) | 2 | 2.0 (1.4) | 32 | 3.0 (1.6) | 15 | 3.3 (1.2) | 9 | 0.4 (1.3) | 13 | 0.6 (1.3) |
| 6 weeks | 67 | 1.6 (1.6) | 2 | 1.5 (2.1) | 30 | 1.9 (1.4) | 15 | 2.4 (1.5) | 7 | 0.3 (0.8) | 13 | 0.7 (1.5) |
| 3 months | 46 | 1.5 (1.5) | 2 | 1.5 (2.1) | 20 | 1.9 (1.2) | 11 | 2.5 (1.6) | 6 | 0.0 (0.0) | 7 | 0.4 (1.1) |
| 6 months | 51 | 1.6 (1.6) | 1 | 0.0 (0.0) | 20 | 2.2 (1.5) | 13 | 2 (1.4) | 6 | 0.3 (0.8) | 11 | 0.7 (1.4) |
| 12 months | 37 | 1.8 (1.7) | 2 | 1.5 (2.1) | 16 | 2.6 (1.7) | 9 | 2.2 (1.4) | 5 | 0.6 (1.3) | 5 | 0.2 (0.4) |

**Supplemental** **Table 3:** Mean medication burden at postoperative timepoints as stratified by individual procedures. ICE2 = iStent infinite insertion, cataract extraction, and endocyclophotocoagulation. Phaco/ECP = phacoemulsification and endocyclophotocoagulation. Phaco/Hydrus = phacoemulsification and Hydrus microstent. Phaco/KDB = phacoemulsification and Kahook Dual Blade. PEcK = phacoemulsification, endocyclophotocoagulation, and Kahook Dual Blade.

## Supplemental Table 4: Change in Best Corrected Distance Visual Acuity

| **Outcome: logMAR** | **Overall** | | | **sMIGS** | | | **cMIGS** | | |
| --- | --- | --- | --- | --- | --- | --- | --- | --- | --- |
| N | Sn | Mean (SD) | N | Sn | Mean (SD) | N | Sn | Mean (SD) |
| Baseline | 71 | 20/51 | 0.41 (0.47) | 37 | 20/51 | 0.41 (0.32) | 34 | 20/51 | 0.41 (0.59) |
| 6 weeks | 67 | 20/43 | 0.33 (0.41) | 35 | 20/43 | 0.33 (0.38) | 32 | 20/43 | 0.34 (0.45) |
| 3 months | 46 | 20/34 | 0.23 (0.24) | 24 | 20/36 | 0.25 (0.27) | 22 | 20/33 | 0.21 (0.2) |
| 6 months | 51 | 20/31 | 0.19 (0.24) | 30 | 20/33 | 0.22 (0.2) | 21 | 20/28 | 0.14 (0.29) |
| 12 months | 37 | 20/34 | 0.23 (0.35) | 19 | 20/33 | 0.21 (0.22) | 18 | 20/35 | 0.24 (0.46) |
| **P-values:** Evaluating the pattern of change | | | | | | | | | |
| Over time | | | | | | | <0.001* | | |
| Comparing sMIGS v cMIGS over time, unadjusted | | | | | | | 0.80 | | |
| Comparing sMIGS v cMIGS over time, adjusteda | | | | | | | 0.52 | | |

**Supplemental Table 4:** Best corrected distance visual acuity as mean logMAR and Snellen (Sn) equivalent at baseline and postoperative timepoints. Wald Tests were used to evaluate significant difference (*p < 0.05) between the pattern of change across timepoints and the pattern of change between all timepoints and the two procedures. aAdjusted for baseline medications. LogMAR = Logarithm of the Minimum Angle of Resolution.

## Supplemental Table 5: Procedural Complications

| **Timepoint** | Corneal Edema,  N (%) | | | Anterior Chamber Inflammation,  N (%) | | | Hyphema or Microhyphema,  N (%) | | |
| --- | --- | --- | --- | --- | --- | --- | --- | --- | --- |
| Overall | sMIGS | cMIGS | Overall | sMIGS | cMIGS | Overall | sMIGS | cMIGS |
| Baseline | 0 (0%) | 0 (0%) | 0 (0%) | 0 (0%) | 0 (0%) | 0 (0%) | 0 (0%) | 0 (0%) | 0 (0%) |
| 1 day | 33  (46.5%) | 14  (37.8%) | 19  (55.9%) | 57  (80.3%) | 28  (75.7%) | 29  (85.3%) | 22  (31%) | 8  (21.6%) | 14  (41.2%) |
| 6 weeks | 3 (4.5%) | 1 (2.9%) | 2 (6.3%) | 5 (7.5%) | 3 (8.6%) | 2 (6.3%) | 3 (4.5%) | 0 (0%) | 3 (9.4%) |
| 3 months | 1 (2.2%) | 0 (0%) | 1 (4.5%) | 4 (8.7%) | 3 (12.5%) | 1 (4.5%) | 1 (2.2%) | 0 (0%) | 1 (4.5%) |
| 6 months | 1 (2.0%) | 1 (3.3%) | 0 (0%) | 1 (2.0%) | 1 (3.3%) | 0 (0%) | 0 (0%) | 0 (0%) | 0 (0%) |
| 12 months | 0 (0%) | 0 (0%) | 0 (0%) | 0 (0%) | 0 (0%) | 0 (0%) | 0 (0%) | 0 (0%) | 0 (0%) |

**Supplemental Table 5:** Procedural complications, including corneal edema, anterior chamber inflammation, and hyphema or microhyphema, represented as N (%) at baseline and each postoperative timepoint and stratified by single MIGS (sMIGS) and combined MIGS (cMIGS).
